# Supplementary material
Source: PubMed Central journal article supplement (PMC5943299)
Supplement: 41437_2017_42_MOESM1_ESM.pdf [file 41437_2017_42_MOESM1_ESM.pdf]

## *Supporting information*

**MS title:** Biases of STRUCTURE software when exploring introduction routes of invasive species

**Authors:** Eric Lombaert, Thomas Guillemaud & Emeline Deleury

|                  |             |
|------------------|-------------|
| <i>Figure S1</i> | <i>p. 2</i> |
| <i>Figure S2</i> | <i>p. 3</i> |
| <i>Table S1</i>  | <i>p. 4</i> |
| <i>Table S2</i>  | <i>p. 5</i> |
| <i>Table S3</i>  | <i>p. 6</i> |

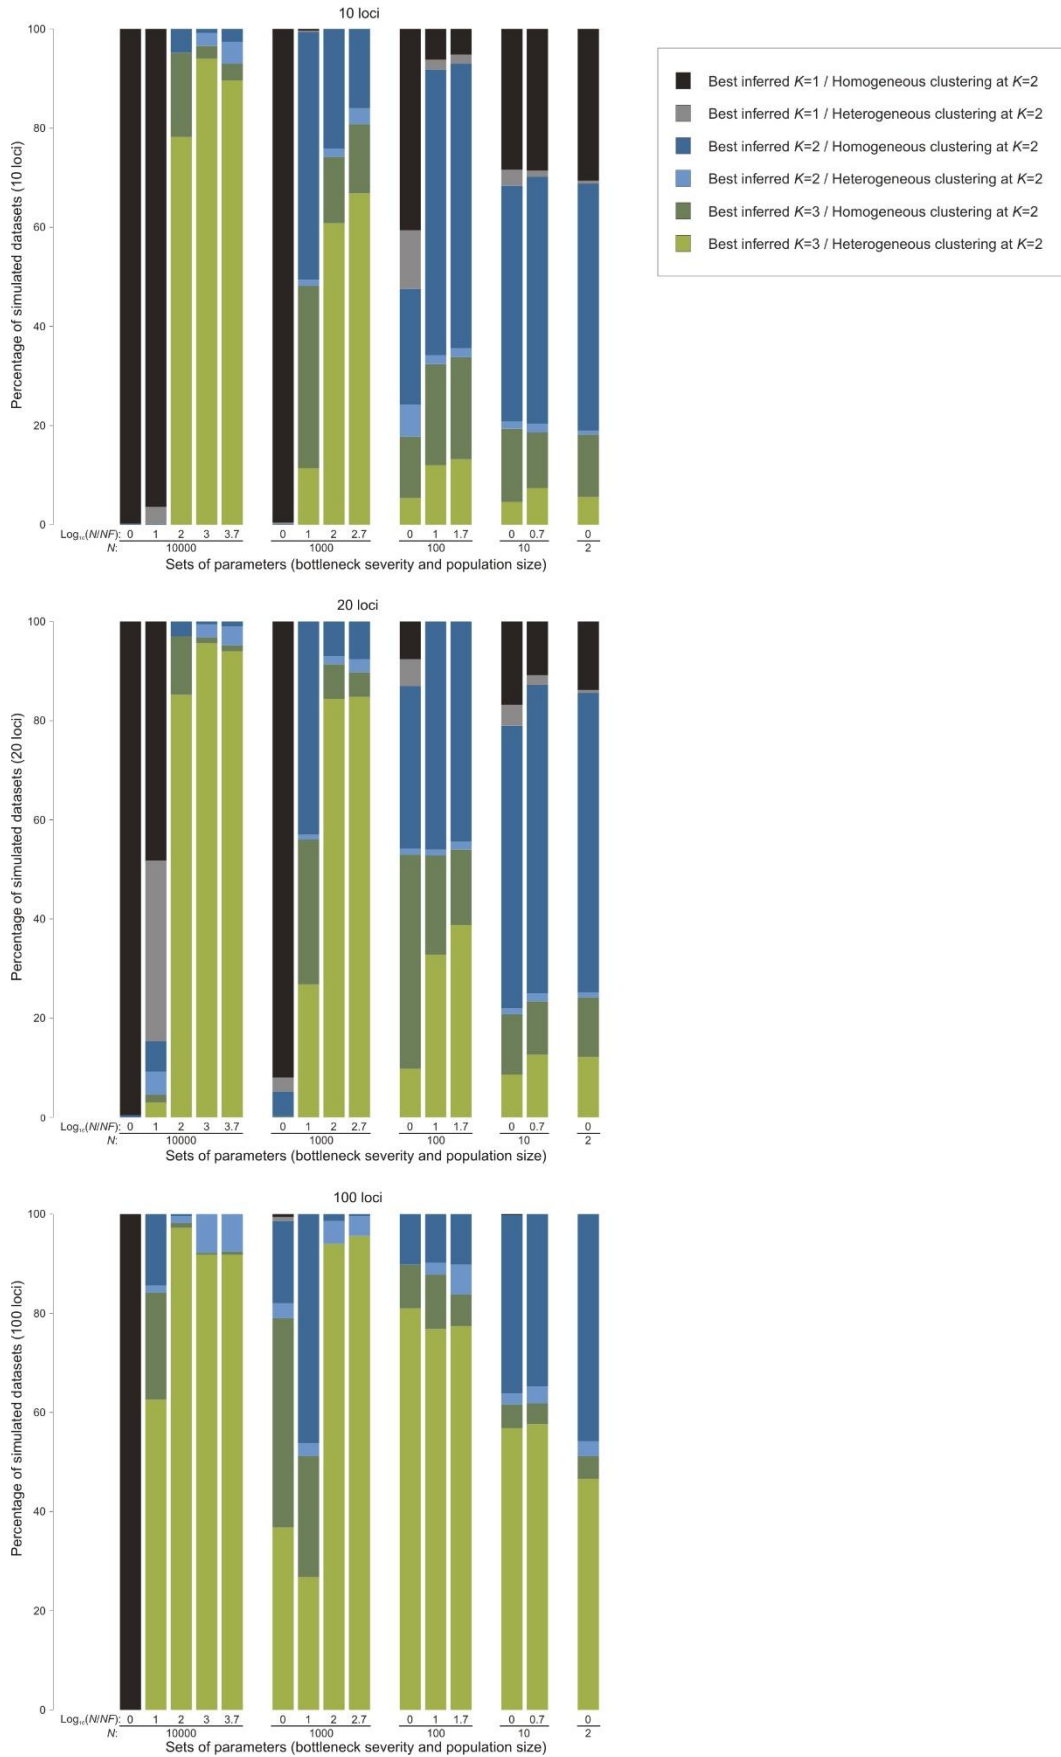

**Figure S1:** Proportion of best inferred values of  $K$  (Evanno's method) and of the absence or presence of genuine multimodality for ten STRUCTURE runs at  $K=2$  for each parameter set and number of loci (i.e. 500 simulated datasets each).

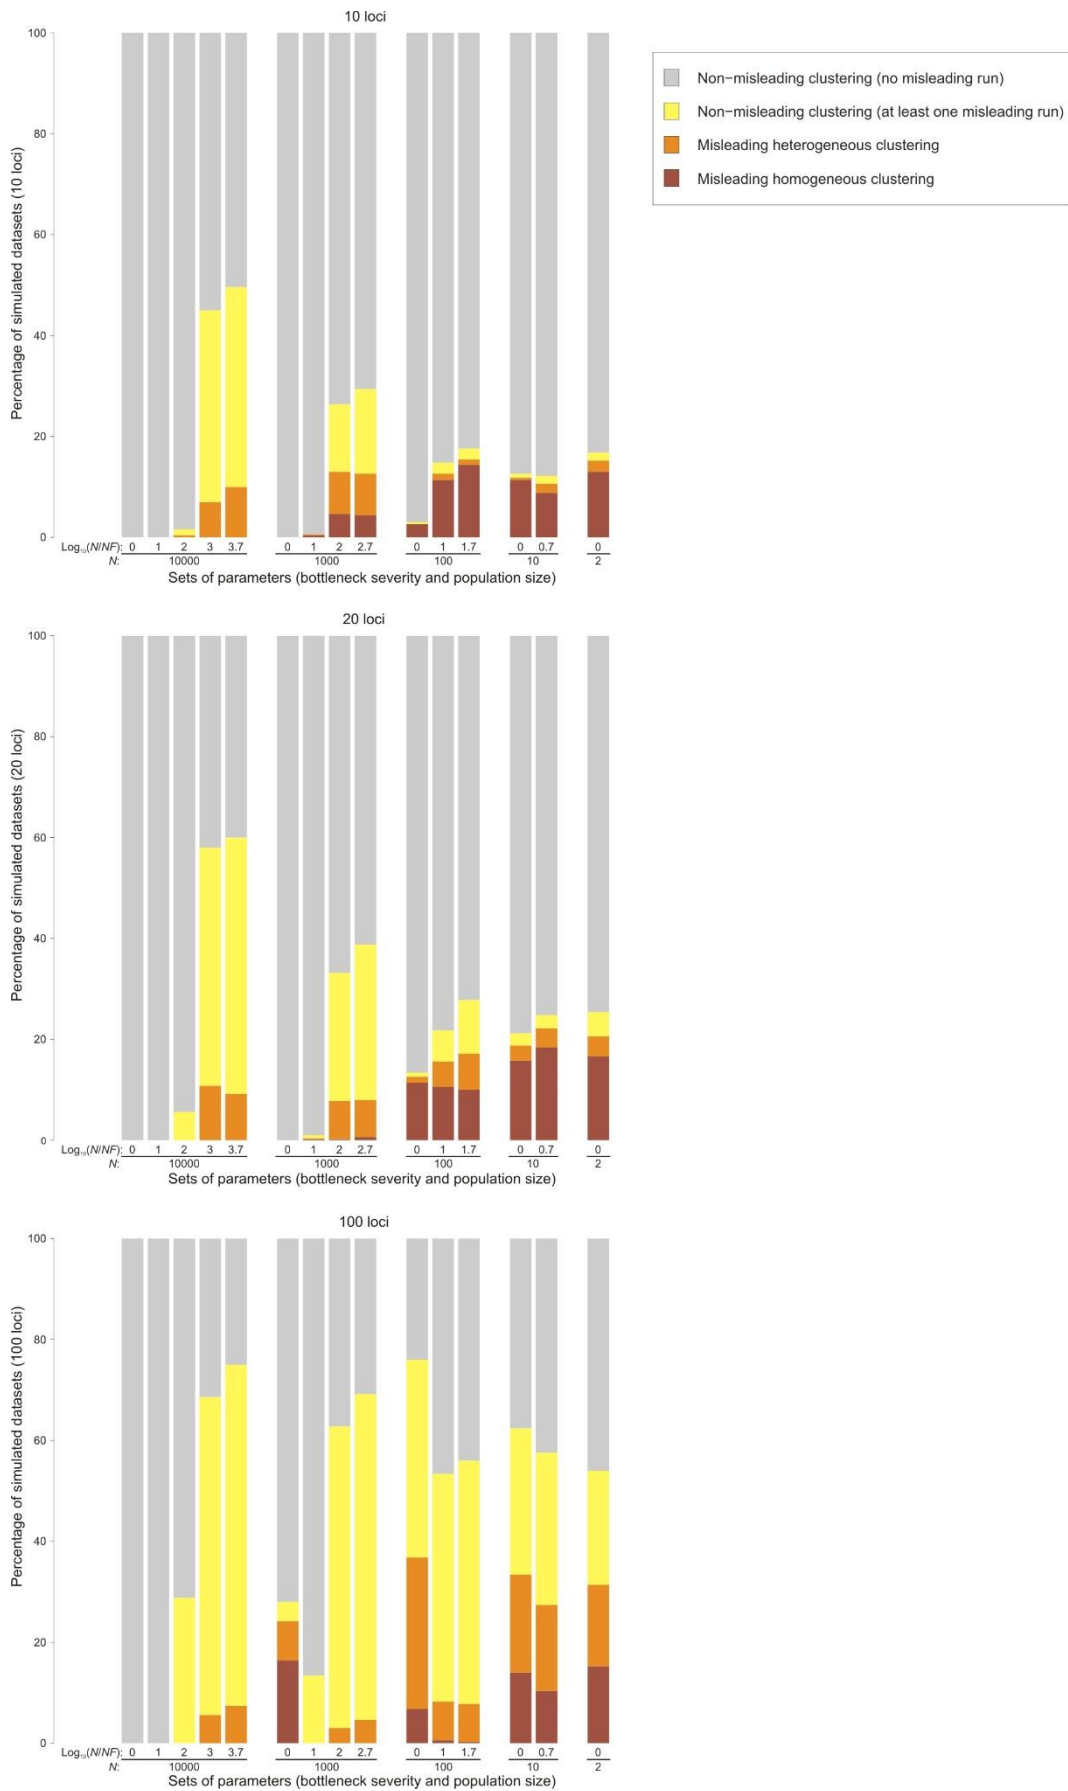

**Figure S2:** Proportion of datasets with or without misleading patterns over the ten STRUCTURE runs at  $K=2$ , for each set of parameters and number of loci.

Summary statistics for the simulated datasets: mean (SD; min-max)

| Nb of loci              | N                       | NF    | Log <sub>10</sub> (N/NF) | Proportion of population differentiation | Summary statistics for the simulated datasets: mean (SD; min-max) |                         |                          |                        |                             |                             |                             |
|-------------------------|-------------------------|-------|--------------------------|------------------------------------------|-------------------------------------------------------------------|-------------------------|--------------------------|------------------------|-----------------------------|-----------------------------|-----------------------------|
|                         |                         |       |                          |                                          | NA1                                                               | NA2 and NA3             | He1                      | He2 and He3            | FST12 and FST13             | FST23                       |                             |
| 10                      | 10000                   | 10000 | 0                        | 0.35                                     | 10.9 (1.31; 6.6-15.2)                                             | 10.92 (1.31; 6.8-15.4)  | 0.83 (0.03; 0.67-0.9)    | 0.83 (0.03; 0.67-0.9)  | 0.002 (0.003; -0.007-0.019) | 0.002 (0.003; -0.006-0.011) |                             |
|                         | 10000                   | 1000  | 1                        | 1                                        | 10.87 (1.19; 7.7-14.2)                                            | 9.66 (1.02; 6.7-12.9)   | 0.83 (0.03; 0.7-0.89)    | 0.81 (0.03; 0.68-0.88) | 0.013 (0.006; 0.001-0.036)  | 0.024 (0.007; 0.009-0.05)   |                             |
|                         | 10000                   | 100   | 2                        | 1                                        | 10.92 (1.26; 7.1-14.9)                                            | 4.9 (0.46; 3.4-6.5)     | 0.83 (0.03; 0.68-0.9)    | 0.65 (0.05; 0.48-0.79) | 0.111 (0.021; 0.05-0.175)   | 0.217 (0.036; 0.118-0.325)  |                             |
|                         | 10000                   | 10    | 3                        | 1                                        | 10.86 (1.26; 7.9-15.4)                                            | 1.26 (0.22; 1-4)        | 0.83 (0.03; 0.7-0.9)     | 0.14 (0.12; 0-0.65)    | 0.453 (0.038; 0.302-0.588)  | 0.901 (0.048; 0.71-1)       |                             |
|                         | 10000                   | 2     | 3.7                      | 1                                        | 10.98 (1.25; 6.9-14.8)                                            | 1.02 (0.11; 1-2)        | 0.83 (0.03; 0.72-0.9)    | 0.02 (0.07; 0-0.51)    | 0.499 (0.022; 0.418-0.574)  | 0.996 (0.008; 0.951-1)      |                             |
|                         | 1000                    | 1000  | 0                        | 0.994                                    | 4.16 (0.54; 2.8-6.4)                                              | 4.16 (0.54; 2.6-6.1)    | 0.51 (0.07; 0.25-0.7)    | 0.51 (0.07; 0.25-0.71) | 0.024 (0.012; -0.004-0.073) | 0.024 (0.013; -0.002-0.088) |                             |
|                         | 1000                    | 100   | 1                        | 1                                        | 4.15 (0.55; 2.3-5.9)                                              | 2.83 (0.38; 1.8-4.1)    | 0.51 (0.07; 0.26-0.69)   | 0.41 (0.07; 0.2-0.61)  | 0.12 (0.04; 0.027-0.307)    | 0.214 (0.06; 0.059-0.449)   |                             |
|                         | 1000                    | 10    | 2                        | 1                                        | 4.18 (0.58; 2.8-6.3)                                              | 1.2 (0.24; 1-3)         | 0.51 (0.08; 0.28-0.7)    | 0.14 (0.15; 0-0.58)    | 0.449 (0.071; 0.198-0.677)  | 0.888 (0.067; 0.63-1)       |                             |
|                         | 1000                    | 2     | 2.7                      | 1                                        | 4.16 (0.57; 2.6-6.1)                                              | 1.03 (0.16; 1-3)        | 0.51 (0.07; 0.24-0.68)   | 0.02 (0.08; 0-0.51)    | 0.499 (0.065; 0.272-0.676)  | 0.993 (0.018; 0.829-1)      |                             |
|                         | 100                     | 100   | 0                        | 0.996                                    | 1.64 (0.27; 1-2.6)                                                | 1.65 (0.25; 1-2.7)      | 0.14 (0.07; 0.01-0.58)   | 0.14 (0.06; 0-0.5)     | 0.176 (0.106; -0.013-0.659) | 0.177 (0.105; -0.008-0.649) |                             |
|                         | 100                     | 10    | 1                        | 0.994                                    | 1.64 (0.24; 1-2.5)                                                | 1.11 (0.22; 1-3)        | 0.13 (0.06; 0.01-0.31)   | 0.12 (0.16; 0-0.65)    | 0.46 (0.198; 0-0.968)       | 0.724 (0.292; -0.017-1)     |                             |
|                         | 100                     | 2     | 1.7                      | 0.99                                     | 1.64 (0.24; 1-2.4)                                                | 1.04 (0.18; 1-3)        | 0.13 (0.07; 0.01-0.59)   | 0.03 (0.08; 0-0.5)     | 0.513 (0.214; 0-0.953)      | 0.798 (0.38; -0.017-1)      |                             |
|                         | 100                     | 10    | 0                        | 0.8                                      | 1.09 (0.22; 1-3)                                                  | 1.08 (0.21; 1-3)        | 0.08 (0.13; 0-0.66)      | 0.09 (0.14; 0-0.56)    | 0.357 (0.369; -0.014-1)     | 0.399 (0.378; -0.008-1)     |                             |
|                         | 100                     | 2     | 0.7                      | 0.652                                    | 1.08 (0.21; 1-2)                                                  | 1.02 (0.13; 1-2)        | 0.08 (0.14; 0-0.51)      | 0.03 (0.09; 0-0.51)    | 0.371 (0.415; -0.008-1)     | 0.406 (0.469; -0.008-1)     |                             |
|                         | 2                       | 2     | 0                        | 0.526                                    | 1.02 (0.15; 1-3)                                                  | 1.03 (0.16; 1-2)        | 0.02 (0.08; 0-0.54)      | 0.03 (0.09; 0-0.51)    | 0.331 (0.447; -0.008-1)     | 0.34 (0.445; -0.011-1)      |                             |
|                         | Over all parameter sets |       |                          |                                          |                                                                   | 5.29 (4.21; 1-15.4)     | 2.93 (3.17; 1-15.4)      | 0.45 (0.32; 0-0.9)     | 0.26 (0.3; 0-0.9)           | 0.292 (0.277; -0.014-1)     | 0.474 (0.428; -0.017-1)     |
|                         | 20                      | 10000 | 10000                    | 0                                        | 0.582                                                             | 10.92 (0.87; 8.85-13.9) | 10.93 (0.89; 8.55-14.05) | 0.83 (0.02; 0.76-0.89) | 0.83 (0.02; 0.75-0.89)      | 0.002 (0.002; -0.005-0.013) | 0.003 (0.002; -0.004-0.011) |
| 10000                   |                         | 1000  | 1                        | 1                                        | 10.91 (0.9; 7.9-13.35)                                            | 9.66 (0.76; 7-11.9)     | 0.83 (0.02; 0.74-0.88)   | 0.81 (0.02; 0.72-0.87) | 0.013 (0.004; 0.003-0.027)  | 0.024 (0.005; 0.012-0.041)  |                             |
| 10000                   |                         | 100   | 2                        | 1                                        | 10.97 (0.85; 8.35-14.3)                                           | 4.93 (0.33; 3.7-5.95)   | 0.83 (0.02; 0.77-0.88)   | 0.66 (0.03; 0.55-0.73) | 0.108 (0.015; 0.069-0.166)  | 0.213 (0.025; 0.155-0.297)  |                             |
| 10000                   |                         | 10    | 3                        | 1                                        | 10.89 (0.93; 8.45-13.8)                                           | 1.27 (0.11; 1-1.65)     | 0.83 (0.02; 0.74-0.89)   | 0.09 (0.05; 0-0.52)    | 0.452 (0.025; 0.373-0.53)   | 0.901 (0.033; 0.775-0.986)  |                             |
| 10000                   |                         | 2     | 3.7                      | 1                                        | 10.91 (0.89; 8.4-13.4)                                            | 1.03 (0.14; 1-2)        | 0.83 (0.02; 0.74-0.88)   | 0.04 (0.11; 0-0.52)    | 0.498 (0.015; 0.447-0.551)  | 0.996 (0.007; 0.965-1)      |                             |
| 1000                    |                         | 1000  | 0                        | 1                                        | 4.15 (0.37; 3-5.45)                                               | 4.15 (0.38; 2.9-5.3)    | 0.51 (0.05; 0.35-0.64)   | 0.51 (0.05; 0.32-0.63) | 0.024 (0.009; 0-0.06)       | 0.024 (0.009; 0.002-0.057)  |                             |
| 1000                    |                         | 100   | 1                        | 1                                        | 4.16 (0.39; 3.1-5.3)                                              | 2.82 (0.26; 2-3.6)      | 0.51 (0.05; 0.34-0.62)   | 0.41 (0.05; 0.24-0.57) | 0.118 (0.027; 0.047-0.227)  | 0.212 (0.041; 0.11-0.363)   |                             |
| 1000                    |                         | 10    | 2                        | 1                                        | 4.15 (0.39; 3.2-5.35)                                             | 1.19 (0.11; 1-2)        | 0.51 (0.05; 0.36-0.66)   | 0.08 (0.08; 0-0.58)    | 0.456 (0.048; 0.281-0.612)  | 0.892 (0.044; 0.747-0.998)  |                             |
| 1000                    |                         | 2     | 2.7                      | 1                                        | 4.16 (0.4; 2.65-5.4)                                              | 1.03 (0.12; 1-2)        | 0.51 (0.05; 0.3-0.63)    | 0.03 (0.09; 0-0.51)    | 0.506 (0.044; 0.356-0.638)  | 0.994 (0.01; 0.907-1)       |                             |
| 100                     |                         | 100   | 0                        | 1                                        | 1.63 (0.17; 1.2-2.25)                                             | 1.63 (0.17; 1.15-2.2)   | 0.13 (0.04; 0.02-0.26)   | 0.13 (0.04; 0.01-0.25) | 0.184 (0.077; 0.013-0.522)  | 0.185 (0.081; 0.019-0.463)  |                             |
| 100                     |                         | 10    | 1                        | 1                                        | 1.64 (0.17; 1.2-2.3)                                              | 1.11 (0.15; 1-3)        | 0.13 (0.04; 0.02-0.29)   | 0.08 (0.13; 0-0.61)    | 0.493 (0.138; 0.064-0.83)   | 0.808 (0.164; 0-1)          |                             |
| 100                     |                         | 2     | 1.7                      | 1                                        | 1.64 (0.17; 1.15-2.2)                                             | 1.03 (0.13; 1-3)        | 0.13 (0.04; 0.04-0.25)   | 0.04 (0.1; 0-0.52)     | 0.567 (0.133; 0.099-0.856)  | 0.965 (0.12; 0-1)           |                             |
| 10                      |                         | 10    | 0                        | 0.954                                    | 1.08 (0.17; 1-3)                                                  | 1.1 (0.18; 1-3)         | 0.09 (0.14; 0-0.64)      | 0.08 (0.13; 0-0.51)    | 0.504 (0.328; -0.011-1)     | 0.524 (0.331; 0-1)          |                             |
| 10                      |                         | 2     | 0.7                      | 0.91                                     | 1.08 (0.13; 1-2)                                                  | 1.03 (0.13; 1-2)        | 0.08 (0.14; 0-0.51)      | 0.04 (0.11; 0-0.51)    | 0.599 (0.369; -0.008-1)     | 0.646 (0.439; -0.008-1)     |                             |
| 2                       |                         | 2     | 0                        | 0.77                                     | 1.03 (0.13; 1-2)                                                  | 1.04 (0.14; 1-2)        | 0.04 (0.11; 0-0.53)      | 0.04 (0.11; 0-0.51)    | 0.532 (0.453; -0.017-1)     | 0.525 (0.457; -0.008-1)     |                             |
| Over all parameter sets |                         |       |                          |                                          | 5.29 (4.18; 1-14.3)                                               | 2.93 (3.15; 1-14.05)    | 0.45 (0.32; 0-0.89)      | 0.26 (0.3; 0-0.89)     | 0.337 (0.286; -0.017-1)     | 0.527 (0.421; -0.008-1)     |                             |
| 100                     |                         | 10000 | 10000                    | 0                                        | 0.996                                                             | 10.93 (0.41; 9.9-12.3)  | 10.93 (0.4; 9.72-12.22)  | 0.83 (0.01; 0.8-0.86)  | 0.83 (0.01; 0.79-0.86)      | 0.002 (0.001; -0.001-0.006) | 0.002 (0.001; -0.001-0.006) |
|                         | 10000                   | 1000  | 1                        | 1                                        | 10.94 (0.4; 9.93-12.69)                                           | 9.68 (0.34; 8.67-11.13) | 0.83 (0.01; 0.8-0.86)    | 0.81 (0.01; 0.78-0.85) | 0.013 (0.002; 0.009-0.019)  | 0.024 (0.002; 0.018-0.033)  |                             |
|                         | 10000                   | 100   | 2                        | 1                                        | 10.96 (0.39; 9.82-12.11)                                          | 4.92 (0.15; 4.43-5.45)  | 0.83 (0.01; 0.8-0.85)    | 0.65 (0.01; 0.61-0.69) | 0.109 (0.007; 0.088-0.131)  | 0.216 (0.011; 0.189-0.252)  |                             |
|                         | 10000                   | 10    | 3                        | 1                                        | 10.92 (0.42; 9.83-12.31)                                          | 1.26 (0.05; 1.13-1.43)  | 0.83 (0.01; 0.8-0.86)    | 0.08 (0.02; 0.03-0.13) | 0.453 (0.011; 0.422-0.493)  | 0.903 (0.014; 0.86-0.936)   |                             |
|                         | 10000                   | 2     | 3.7                      | 1                                        | 10.93 (0.39; 9.84-12.62)                                          | 1.03 (0.03; 1-2)        | 0.83 (0.01; 0.8-0.86)    | 0.02 (0.07; 0-0.51)    | 0.499 (0.007; 0.474-0.521)  | 0.996 (0.003; 0.981-1)      |                             |
|                         | 1000                    | 1000  | 0                        | 1                                        | 4.13 (0.16; 3.45-4.55)                                            | 4.13 (0.17; 3.55-4.62)  | 0.5 (0.02; 0.43-0.56)    | 0.5 (0.02; 0.43-0.57)  | 0.024 (0.004; 0.013-0.04)   | 0.023 (0.004; 0.012-0.033)  |                             |
|                         | 1000                    | 100   | 1                        | 1                                        | 4.13 (0.16; 3.69-4.7)                                             | 2.81 (0.12; 2.42-3.29)  | 0.51 (0.02; 0.43-0.58)   | 0.41 (0.02; 0.33-0.48) | 0.118 (0.012; 0.082-0.153)  | 0.213 (0.02; 0.159-0.28)    |                             |
|                         | 1000                    | 10    | 2                        | 1                                        | 4.15 (0.18; 3.68-4.62)                                            | 1.19 (0.04; 1.07-1.34)  | 0.51 (0.02; 0.44-0.57)   | 0.06 (0.01; 0.02-0.1)  | 0.458 (0.023; 0.387-0.531)  | 0.893 (0.019; 0.827-0.946)  |                             |
|                         | 1000                    | 2     | 2.7                      | 1                                        | 4.14 (0.16; 3.71-4.66)                                            | 1.03 (0.03; 1-2)        | 0.51 (0.02; 0.45-0.56)   | 0.02 (0.08; 0-0.52)    | 0.507 (0.019; 0.431-0.562)  | 0.993 (0.005; 0.974-1)      |                             |
|                         | 100                     | 100   | 0                        | 1                                        | 1.63 (0.08; 1.44-1.88)                                            | 1.64 (0.07; 1.4-1.88)   | 0.13 (0.02; 0.08-0.19)   | 0.13 (0.02; 0.09-0.2)  | 0.194 (0.033; 0.099-0.323)  | 0.193 (0.036; 0.105-0.31)   |                             |
|                         | 100                     | 10    | 1                        | 1                                        | 1.64 (0.08; 1.43-1.9)                                             | 1.11 (0.03; 1.03-1.22)  | 0.13 (0.02; 0.08-0.19)   | 0.03 (0.01; 0-0.07)    | 0.516 (0.058; 0.293-0.658)  | 0.841 (0.044; 0.621-0.952)  |                             |
|                         | 100                     | 2     | 1.7                      | 1                                        | 1.63 (0.08; 1.41-1.86)                                            | 1.03 (0.04; 1-2)        | 0.13 (0.02; 0.07-0.19)   | 0.02 (0.07; 0-0.51)    | 0.582 (0.054; 0.417-0.732)  | 0.978 (0.016; 0.903-1)      |                             |
|                         | 10                      | 10    | 0                        | 1                                        | 1.08 (0.03; 1-1.18)                                               | 1.08 (0.03; 1-1.19)     | 0.02 (0.02; 0-0.49)      | 0.02 (0.01; 0-0.18)    | 0.676 (0.116; 0.176-0.947)  | 0.677 (0.117; 0.096-0.96)   |                             |
|                         | 10                      | 2     | 0.7                      | 1                                        | 1.08 (0.03; 1-1.18)                                               | 1.03 (0.03; 1-2)        | 0.02 (0.01; 0-0.05)      | 0.02 (0.06; 0-0.51)    | 0.8 (0.099; 0.068-0.989)    | 0.929 (0.068; 0-1)          |                             |
|                         | 2                       | 2     | 0                        | 1                                        | 1.04 (0.08; 1-2)                                                  | 1.03 (0.04; 1-2)        | 0.02 (0.07; 0-0.51)      | 0.02 (0.06; 0-0.5)     | 0.903 (0.102; -0.002-1)     | 0.901 (0.07; 0.051-1)       |                             |
|                         | Over all parameter sets |       |                          |                                          |                                                                   | 5.29 (4.16; 1-12.69)    | 2.93 (3.14; 1-12.22)     | 0.44 (0.33; 0-0.86)    | 0.24 (0.3; 0-0.86)          | 0.39 (0.29; -0.002-1)       | 0.586 (0.401; -0.001-1)     |

**Table S1:** Demographic parameters ( $N$  and  $NF$ ), corresponding to bottleneck severity ( $\log_{10}(N/NF)$ ), proportion of the dataset displaying significant population differentiation (Fisher's exact test) and mean summary statistics for the simulated datasets (500 datasets per number of loci and set of parameters).

| Clustering codes                  | 10 loci |       | 20 loci |       | 100 loci |       |
|-----------------------------------|---------|-------|---------|-------|----------|-------|
|                                   | Nb runs | %     | Nb runs | %     | Nb runs  | %     |
| 0/100/100                         | 5,930   | 7.91  | 7,700   | 10.27 | 11,545   | 15.39 |
| 50/50/50                          | 26,169  | 34.89 | 17,449  | 23.27 | 5,591    | 7.45  |
| $C_{1A}/0/100$ and $C_{1A}/100/0$ | 39,629  | 52.84 | 46,470  | 61.96 | 57,051   | 76.07 |
| 0/0/100                           | 17,671  | 23.56 | 21,127  | 28.17 | 23,246   | 30.99 |
| 0/100/0                           | 18,235  | 24.31 | 20,798  | 27.73 | 22,479   | 29.97 |
| 25/100/0                          | 1,529   | 2.04  | 1,873   | 2.50  | 5,341    | 7.12  |
| 25/0/100                          | 1,439   | 1.92  | 1,960   | 2.61  | 5,590    | 7.45  |
| 50/0/100                          | 755     | 1.01  | 712     | 0.95  | 395      | 0.53  |
| Other codes                       | 3,272   | 4.36  | 3,381   | 4.51  | 813      | 1.08  |
| Total                             | 75,000  | 100   | 75,000  | 100   | 75,000   | 100   |

**Table S2:** Number and proportion of the main clustering codes observed in STRUCTURE runs (for each number of loci: 15 sets of parameters x 500 datasets per set x 10 runs per dataset = 75,000 STRUCTURE runs).

| Cut-off values     | 10 loci      |             | 20 loci      |             | 100 loci     |             | Total        |             |
|--------------------|--------------|-------------|--------------|-------------|--------------|-------------|--------------|-------------|
|                    | Nb datasets  | %           |
| 0.1 and 0.9        | 1,081        | <i>14.4</i> | 1,595        | <i>21.3</i> | 3,466        | <i>46.2</i> | 6,142        | <i>27.3</i> |
| <b>0.2 and 0.8</b> | <b>1,148</b> | <b>15.3</b> | <b>1,655</b> | <b>22.1</b> | <b>3,526</b> | <b>47.0</b> | <b>6,329</b> | <b>28.1</b> |
| 0.3 and 0.7        | 1,210        | <i>16.1</i> | 1,713        | <i>22.8</i> | 3,544        | <i>47.3</i> | 6,467        | <i>28.7</i> |

**Table S3:** Number and proportion of datasets with at least one run (of ten) displaying a “misleading pattern” (i.e. code 0/100/100), depending on the cut-off values used to define the summarized codes of STRUCTURE patterns (over 7,500 datasets for each number of loci). The row shown in bold corresponds to the cut-off used in the article.
